# Supplementary material for: Development and Validation of Predictive Assessment of Complicated Diverticulitis Score
Source: MDPI journal article supplement (doi:10.3390/jpm11020080), 2021-01-29
Supplement: s1 [file s1]

**Supplementary Figure 1.** Receiver Operating Characteristic (ROC) curve of PACO-D score with respect to cumulative major endpoint (death, admission to intensive care unit/Ventilation, sepsis) in derivation (1089 patients) and in validation (282 patients) cohorts. Area under ROC curve was 0.603 (0.494 – 0.712) in derivation cohort and 0.698 (0.558 – 0.837) in validation cohort (p=0.293).

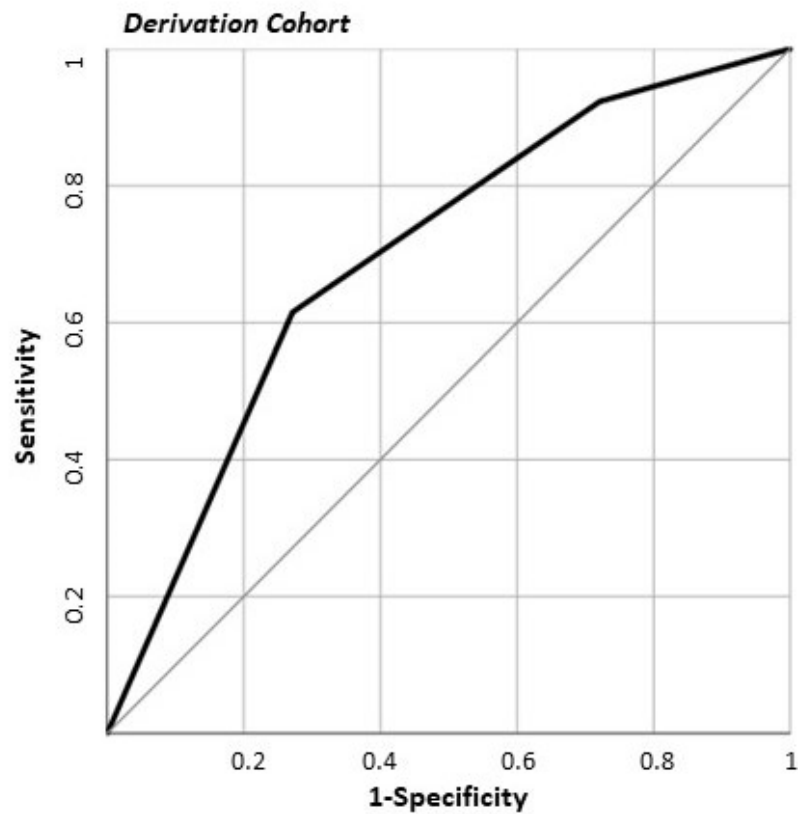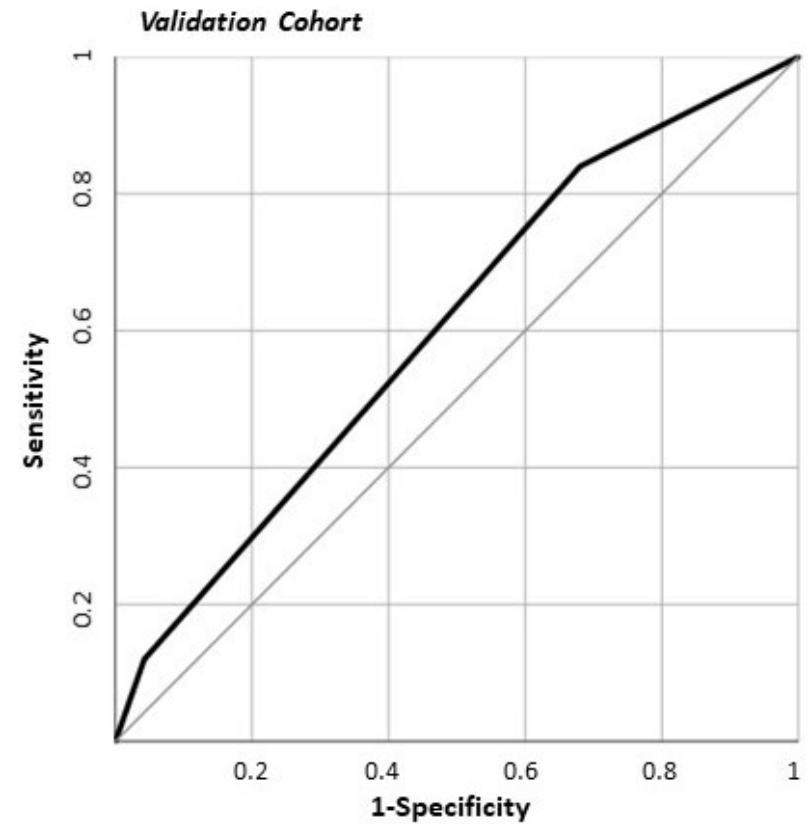

**Supplementary Table 1** –Comparison of demographic and clinical characteristics between patients with complicated and uncomplicated diverticulitis at emergency department admission (validation cohort).

| <b>Variable</b>           | <b>All<br/>population<br/>n 282</b> | <b>Uncomplicated<br/>diverticulitis<br/>n 163</b> | <b>Complicated<br/>diverticulitis<br/>n 119</b> | <b>p</b> |
|---------------------------|-------------------------------------|---------------------------------------------------|-------------------------------------------------|----------|
| Age (Years), median (IQR) | 69 (57 – 81)                        | 68 (56 – 78)                                      | 73 (57 – 84)                                    | 0.102    |
| Sex (Male)                | 129 (45.7)                          | 71 (43.6)                                         | 58 (48.7)                                       | 0.388    |
| <i>Presentation</i>       |                                     |                                                   |                                                 |          |
| Fever                     | 113 (40.1)                          | 70 (42.9)                                         | 43 (36.1)                                       | 0.249    |
| Abdominal pain            | 197 (69.9)                          | 118 (72.4)                                        | 79 (66.4)                                       | 0.278    |
| Vomit                     | 54 (19.1)                           | 34 (20.9)                                         | 20 (16.8)                                       | 0.393    |
| Constipation              | 16 (5.7)                            | 7 (4.3)                                           | 9 (7.6)                                         | 0.241    |
| Diarrhea                  | 44 (15.6)                           | 31 (19.0)                                         | 13 (10.9)                                       | 0.064    |
| Weight loss               | 13 (4.6)                            | 12 (7.4)                                          | 1 (0.8)                                         | 0.009    |
| <i>Therapy</i>            |                                     |                                                   |                                                 |          |
| PPIs                      | 36 (12.8)                           | 29 (17.8)                                         | 7 (5.9)                                         | 0.003    |
| Aspirin                   | 60 (21.3)                           | 44 (27.0)                                         | 16 (13.4)                                       | 0.006    |
| FANS in previous week     | 13 (4.6)                            | 11 (6.7)                                          | 2 (1.7)                                         | 0.045    |
| Steroid                   | 13 (4.6)                            | 7 (4.3)                                           | 6 (5.0)                                         | 0.767    |
| Anticoagulation (VKA)     | 9 (3.2)                             | 3 (1.8)                                           | 6 (5.0)                                         | 0.131    |
| Statin                    | 17 (6.0)                            | 12 (7.4)                                          | 5 (4.2)                                         | 0.271    |
| <i>Laboratory Values</i>  |                                     |                                                   |                                                 |          |
| Hemoglobin (g/dL)         | 12.9 [11.2 – 14.2]                  | 13.1 [11.4 – 14.3]                                | 12.5 [10.4 – 14.1]                              | 0.015    |
| WBC (x10 <sup>9</sup> /L) | 9.0 [6.0 – 12.0]                    | 8.7 [6.0 – 12.1]                                  | 9.1 [6.5 – 14.5]                                | 0.006    |
| Fibrinogen (mg/dL)        | 474 [364 – 611]                     | 474 [359 – 607]                                   | 476 [373 – 622]                                 | 0.711    |
| C reactive protein (mg/L) | 47 [21 – 82]                        | 41 [16 – 71]                                      | 55 [34 – 105]                                   | <0.001   |
| <i>Comorbidities</i>      |                                     |                                                   |                                                 |          |

|                              |            |            |           |       |
|------------------------------|------------|------------|-----------|-------|
| Charlson Comorbidity index   | 2 [1 – 4]  | 2 [1 – 4]  | 2 [1 – 4] | 0.637 |
| First episode diverticulitis | 208 (73.8) | 116 (71.2) | 92 (77.3) | 0.247 |
| Hypertension                 | 35 (12.4)  | 17 (10.4)  | 18 (15.)  | 0.237 |
| Obesity                      | 8 (2.8)    | 3 (1.8)    | 5 (4.2)   | 0.288 |
| Heavy smoker                 | 19 (6.7)   | 10 (6.1)   | 9 (7.6)   | 0.637 |

*Abbreviations: IQR, interquartile range; VKA, vitamin K antagonists; PPIs, Proton Pump Inhibitors; NSAIDs, non-steroidal anti-inflammatory drugs; WBC white blood count.*

**Supplementary Table 2** – Validation cohort: comparison of patient outcomes between complicated and uncomplicated diverticulitis

| <b>Variable</b>                  | <b>All<br/>population<br/>n 282</b> | <b>Uncomplicated<br/>diverticulitis<br/>n 163</b> | <b>Complicated<br/>diverticulitis<br/>n 119</b> | <b>p</b> |
|----------------------------------|-------------------------------------|---------------------------------------------------|-------------------------------------------------|----------|
| Death                            | 5 (1.8)                             | 1 (0.6)                                           | 4 (3.4)                                         | 0.166    |
| Sepsis                           | 10 (3.5)                            | 3 (1.8)                                           | 7 (5.8)                                         | 0.065    |
| Mechanical ventilation           | 2 (0.7)                             | 0                                                 | 2 (1.7)                                         | 0.177    |
| Major Complications <sup>†</sup> | 13 (4.6)                            | 5 (3.0)                                           | 8 (6.7)                                         | 0.148    |
| Any Surgical procedure           | 27 (9.6)                            | 4 (2.5)                                           | 23 (19.3)                                       | <0.001   |
| Major Surgery                    | 20 (7.1)                            | 1 (0.6)                                           | 19 (16.0)                                       | <0.001   |
| Percutaneous drainage            | 7 (2.5)                             | 3 (1.8)                                           | 4 (3.4)                                         | <0.001   |
| Colostomy                        | 10 (3.5)                            | 1 (0.6)                                           | 9 (7.6)                                         | 0.002    |
| LOS <sup>‡</sup>                 | 4.6 [1.7 – 8.4]                     | 3.4 [0.4 – 5.3]                                   | 6.5 [4.5 – 12.2]                                | <0.001   |

*Results are expressed as number (percentage) or median (interquartile range) as appropriate.*

*Abbreviations: LOS, length of hospital stay*

*<sup>†</sup>Major complications include admission to intensive care units/mechanical ventilation, sepsis, or death.*

*<sup>‡</sup>, LOS is calculated from emergency department admission to hospital discharge.*

## Appendix 1

### Development of the Predictive Score

Aim of the study was to create a simple score that could accurately predict the risk for complicated AD at patient's bedside evaluation in ED.

Factors associated to complicated AD in our derivation cohort were assessed by univariate analysis (Chi<sup>2</sup> for categorical variables and Mann-Whitney U test for continuous variables).

Factors with significant association to complicated AD were entered into a logistic regression model in order to identify independent predictors of complicated AD in our cohort. Prior to be entered into the logistic models, continuous variables were dichotomized by using ROC analysis. Cut-off for dichotomization was chosen as a value reaching at least 80% specificity for complicated AD in our cohort.

When entered into the logistic regression analysis 6 variables resulted to be independently associated with complicated AD: Sex, Hb, CRP, Obesity, Constipation, absence of PPI therapy. These variables were included in the PACO Score.

To assign a score value to each of the variables, we created a simple linear regression model including all these predictors. The coefficients of these predictors can be understood as the predicted change of complicated diverticulitis risk imparted by each variable by itself, whereas the adjusted coefficients could be intended as the relative contribution of each factor in the cumulative 6 factor model.

#### *Model results were*

R = 0.290; R-square = 0.84; Adj R-Square = 0.079.

|              | Unstandardized coefficients |                |  | Standardized coefficients |                         |         |
|--------------|-----------------------------|----------------|--|---------------------------|-------------------------|---------|
| Variable     | $\beta$                     | Standard error |  | $\beta$                   | 95% confidence interval | P value |
| Sex (Male)   | 0.109                       | 0.026          |  | 0.122                     | 0.057 – 0.108           | <0.001  |
| Constipation | 0.105                       | 0.040          |  | 0.076                     | 0.026 – 0.184           | 0.009   |
| HB <11.9     | 0.190                       | 0.031          |  | 0.183                     | 0.130 – 0.250           | <0.001  |
| PCR >80      | 0.147                       | 0.030          |  | 0.142                     | 0.088 – 0.207           | <0.001  |
| Obesity      | 0.305                       | 0.136          |  | 0.065                     | 0.038 – 0.573           | 0.025   |
| Not on PPI   | 0.109                       | 0.039          |  | 0.080                     | 0.031 – 0.186           | 0.006   |

Based on standardized coefficients the incremental contribute of each variable to association with complicated diverticulitis was similar (about +10% each). For this reason we assigned 1 point for each Factor

|                       |
|-----------------------|
| <b>PACO variables</b> |
|-----------------------|

|              |           |
|--------------|-----------|
| Male sex     | + 1 point |
| PCR >80      | + 1 point |
| HB <12       | + 1 point |
| Constipation | + 1 point |
| Not on PPI   | + 1 point |
| Obesity      | + 1 point |

After assigning a PACO-diverticulitis score value to each of the patients in derivation and validation cohort we performed a visual calibration of the PACO-diverticulitis score in both cohorts to identify the risk class for each value.

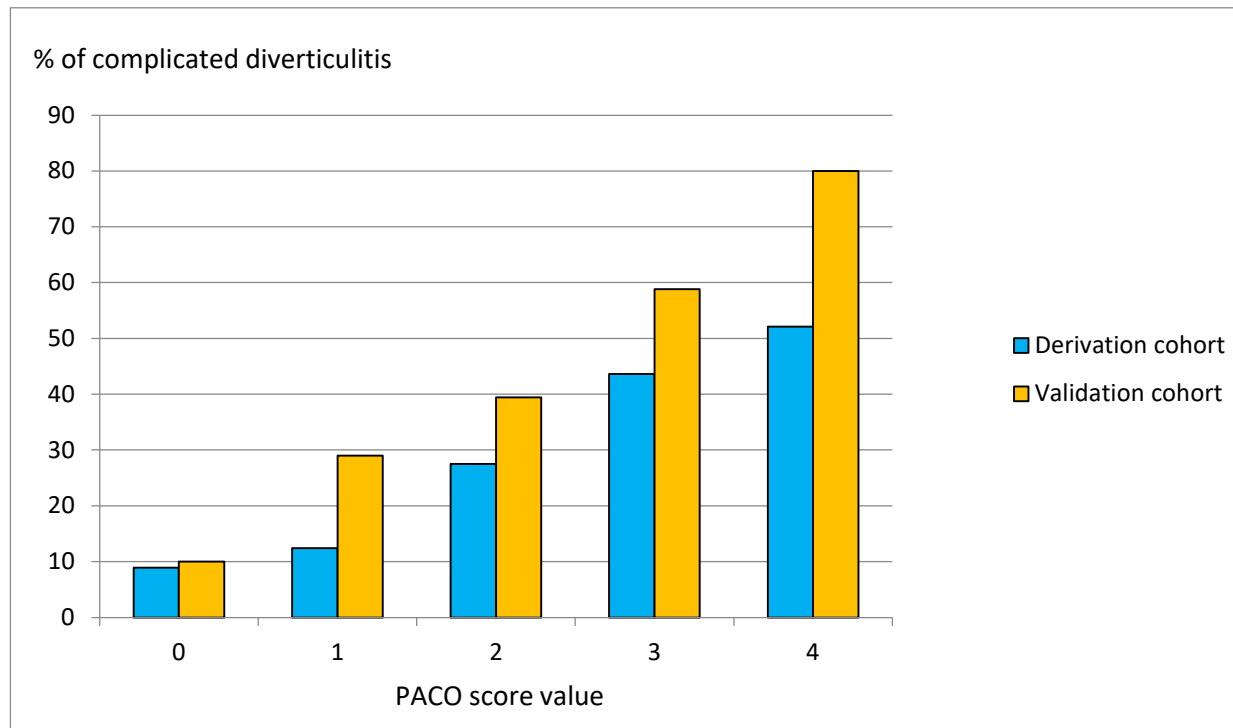

Based on visual calibration data of PACO score in our cohort, we included in low risk group PACO values 0-1, Medium risk group PACO values 2-3 and High risk score PACO  $\geq 4$
